# Supplementary material for: Treatment outcomes and late toxicities of 869 patients with nasopharyngeal carcinoma treated with definitive intensity modulated radiation therapy: new insight into the value of total dose of cisplatin and radiation boost
Source: PubMed Central journal article supplement (PMC4742007; doi:10.18632/oncotarget.5420), 2015-10-14
Supplement: oncotarget-06-38381-s001.pdf [file oncotarget-06-38381-s001.pdf]

SUPPLEMENTARY FIGURES AND TABLE

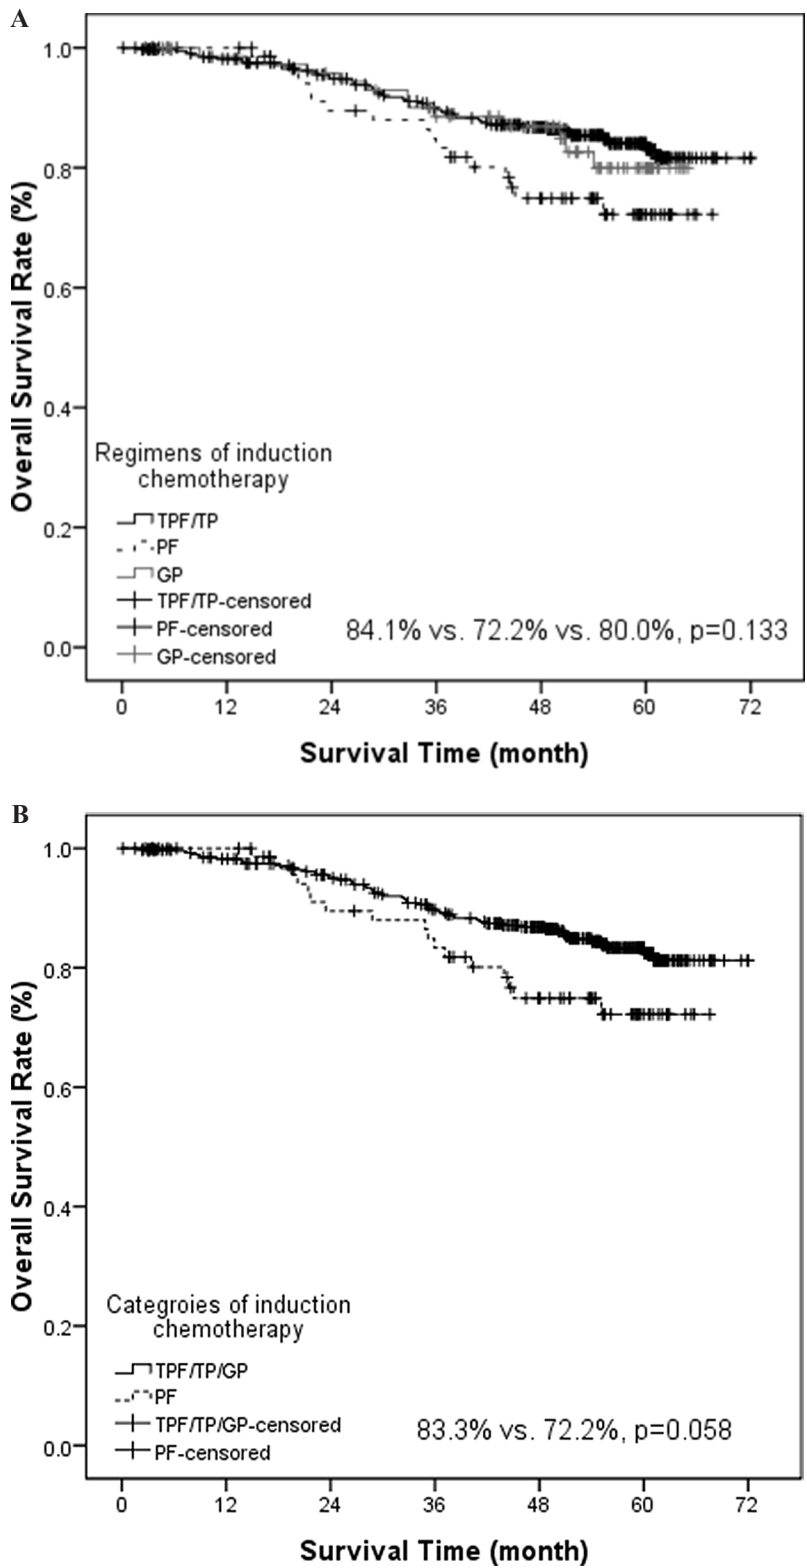

Supplementary Figure S1: Kaplan-Meier estimate of overall survival stratified by various regimens of induction chemotherapy (A) and categories of induction chemotherapy (B).

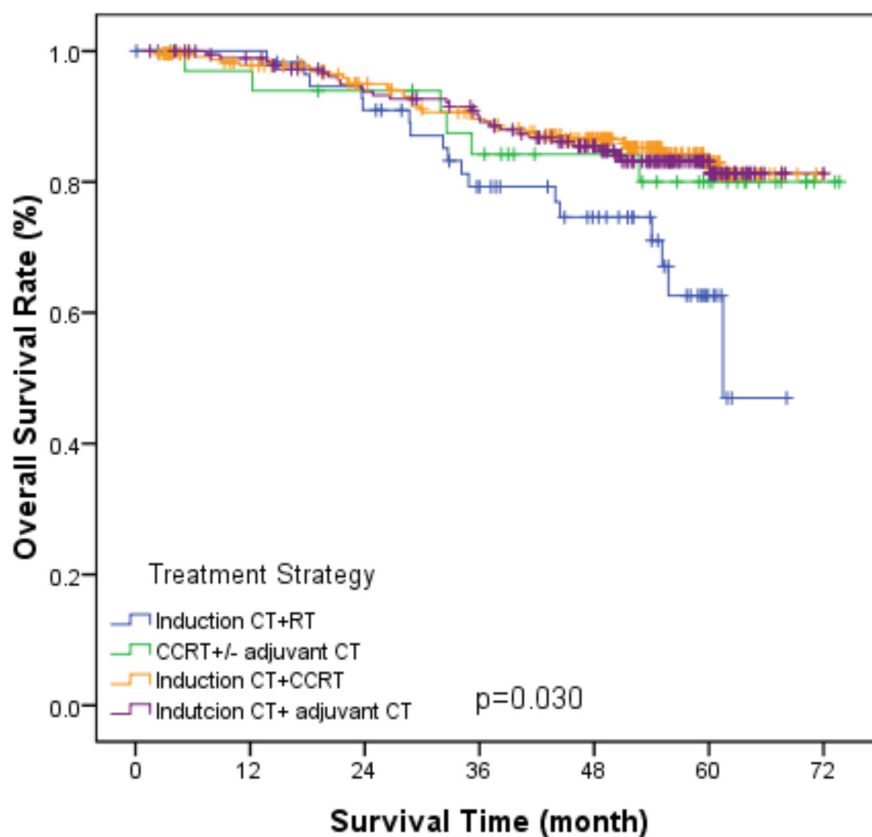

**Supplementary Figure S2: Kaplan-Meier estimate of overall survival stratified by treatment strategy.** The 5-year overall survival rates of induction chemotherapy plus radiation, induction chemotherapy plus concurrent chemoradiation, induction chemotherapy plus adjuvant chemotherapy and concurrent chemoradiation with/without adjuvant chemotherapy were 62.6%, 83.0%, 83.1% and 80.0%, respectively ( $p = 0.030$ ). Abbreviation: CT. = chemotherapy; RT. = radiation; CCRT. = concurrent chemoradiation.

**Supplementary Table S1: The comparison of dosimetric statistics of the subgroups with or without radiation boost (mean value)**

| Dosimetric statistics (Gy) | Without boost | With radiation boost* | <i>p</i> value |
|----------------------------|---------------|-----------------------|----------------|
| PTV-T <sub>max</sub>       | 75.1          | 74.1                  | 0.167          |
| PTV-T <sub>min</sub>       | 60.1          | 60.9                  | 0.539          |
| PTV-T <sub>mean</sub>      | 70.6          | 70.3                  | 0.592          |
| PTV-LN <sub>max</sub>      | 72.7          | 72.9                  | 0.665          |
| PTV-LN <sub>min</sub>      | 55.9          | 55.8                  | 0.990          |
| PTV-LN <sub>mean</sub>     | 68.3          | 68.5                  | 0.708          |
| V95-T (%)                  | 99.6          | 99.8                  | 0.114          |
| V95-LN (%)                 | 99.8          | 99.9                  | 0.351          |

\*All the dosimetric parameters of this subgroup were evaluated at primary planning, before the radiation boost.
